# Supplementary material for: Direct observation of magnetic ordering induced via systematic lattice disorder in artificial rhombus spin ices
Source: Royal Society of Chemistry journal article supplement (doi:10.1039/d3nr01012k), 2023-01-01
Supplement: d3nr01012k1.pdf [file d3nr01012k1.pdf]

## Supplementary Figures

### Direct Observation of Magnetic Ordering induced via Systematic Lattice Disorder in Artificial Rhombus Spin Ices

Timothy R. Cote<sup>1,2</sup>, Amanda K. Petford-Long<sup>1,2</sup>, Charudatta Phatak<sup>1,2</sup>

1. Materials Science Division, Argonne National Laboratory
2. Department of Materials Science & Engineering, Northwestern University

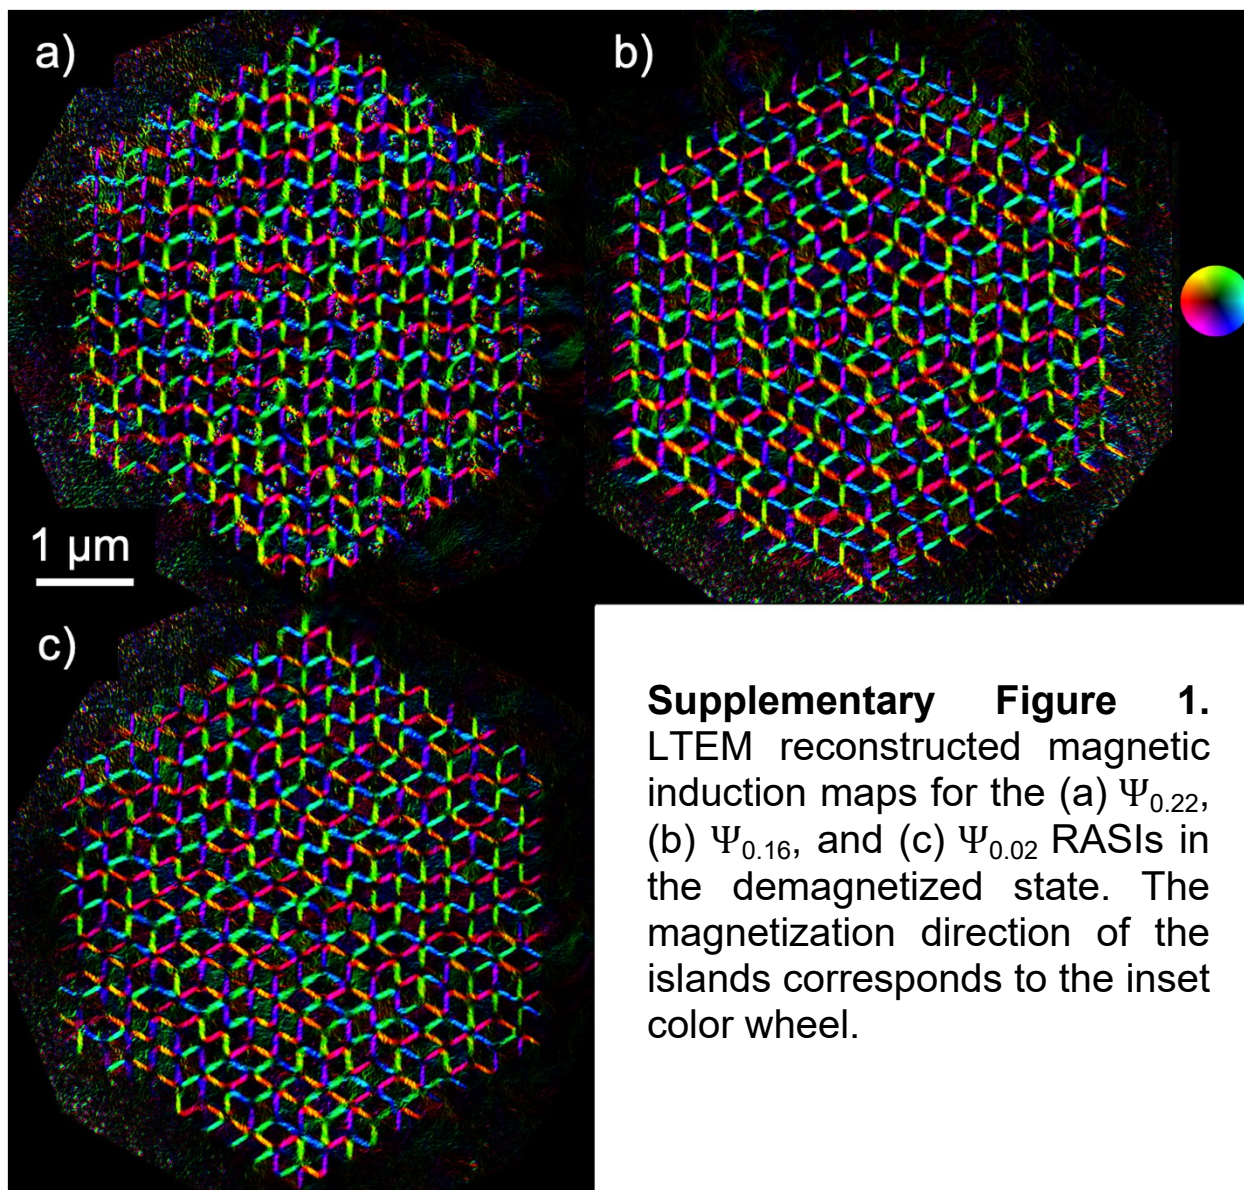

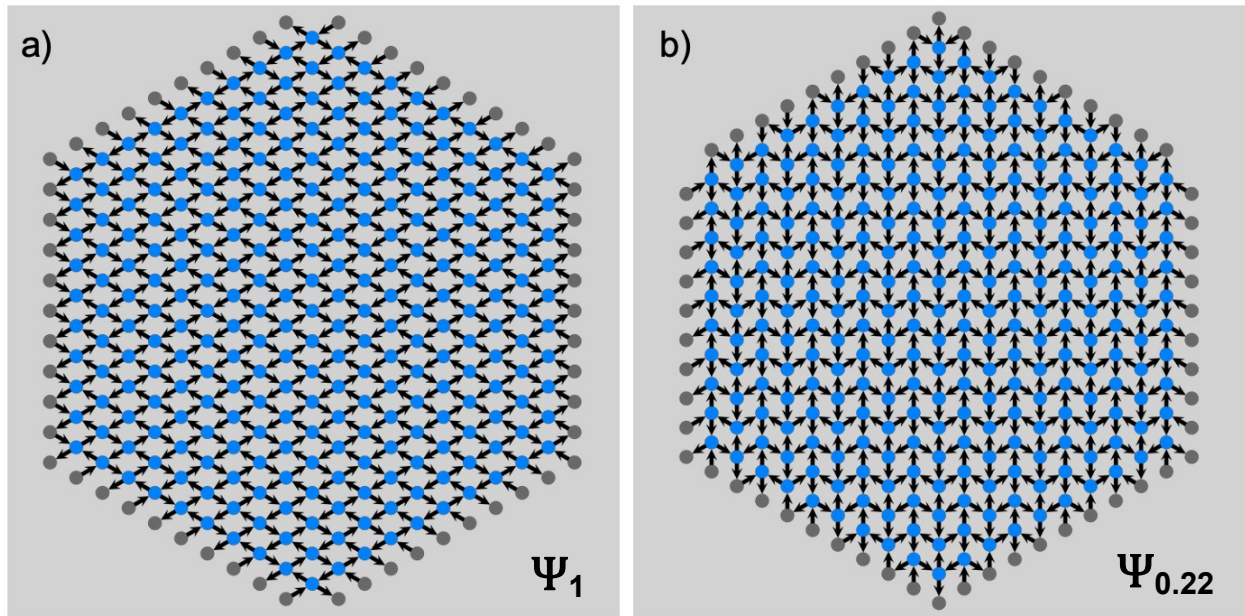

**Supplementary Figure 2.** The ground state directed motif energy graphs for (a)  $\Psi_1$  and (b)  $\Psi_{0.22}$ . The magnetic ordering is the same as that of a square ASI, with no degenerate spins nor motif excitations.
